# Supplementary material for: Discovery of midgut genes for the RNA interference control of corn rootworm
Source: PubMed Central journal article supplement (PMC4964579; doi:10.1038/srep30542), 2016-07-28
Supplement: srep30542-s1.pdf [file srep30542-s1.pdf]

## Supplementary information

### Discovery of midgut genes for the RNA interference control of corn rootworm

Xu Hu<sup>1\*</sup>, Nina M. Richtman<sup>1</sup>, Jian-Zhou Zhao<sup>1</sup>, Keith E. Duncan<sup>2</sup>, Xiping Niu<sup>1</sup>, Lisa A. Procyk<sup>1</sup>, Meghan A. Oneal<sup>1</sup>, Bliss M. Kernodle<sup>1</sup>, Joseph P. Steimel<sup>1</sup>, Virginia C. Crane<sup>1</sup>, Gary Sandahl<sup>1</sup>, Julie L. Ritland<sup>1</sup>, Richard J. Howard<sup>2</sup>, James K. Presnail<sup>1,3</sup>, Albert L. Lu<sup>1</sup>, and Gusui Wu<sup>1</sup>

<sup>1</sup>DuPont Pioneer, Johnston, IA, USA. <sup>2</sup>DuPont Pioneer, Wilmington, DE, USA.

<sup>3</sup>Present address: Evogene Ltd., Saint Louis, MO, USA.

\*Corresponding Author: Xu Hu, DuPont Pioneer, 7300 NW 62nd Ave. Johnston, IA 50131, USA

Telephone: 1-(515)-535-2105

E-mail: xu.hu@pioneer.com



```

*****.. ***** ***.*.:.** ::::.*:*****: * *****:*****:*. :**
DVSSJ2      NTIAIEVRRRPLDSRWRYRLDVIADNRRLYFDRPSLKFQHFQGVTIYTPSYILNQSEVII
MESH        TTTTIEVRLRPLHARWRYRLDVLADGRRVYFDRESLKFQHFQGVTVYTPTYLLNQSQVVV
           .* :***** ***.:.:*****:*. *.**:* ***:*****:***:***:*.:***:*.:
DVSSJ2      MFDNGAGMEVVDNQGFMSARVFLPWSFINKTIGLFGNWSFNKEDDFTLPDGSRAAIVNNI
MESH        QFDAGIGVEVVENEGYMTGRVFLPWKFINKTAGLFGNWSFNKLDFFMLPNGQVAQLN--L
           ** * *:****:*.:.:*.:*****.***** ***** *** **:* * : :
DVSSJ2      NDMERVYNDFGSKWMLDVLDPQKGRALFHREFGRTSATYNNKTFKPQFLMNPEDFLPTN
MESH        NDLRSIHTNFGIKWMLTDREVPGVGAALFKREFGRMSGYYANATFQPNYVLDPADFLPAN
           **:.. :.:.:** ***** * * * ***:***** *. * * ***:***:..:.* *****:*
DVSSJ2      RSTDALKRISEICPLKLYECYYDYAMTVDRDLAHYTKNYKATIIYQYKETTRRKVVSCGVLE
MESH        RSYDLERAEEELCG-ECMQCQYDYAMTLNRDLAHFTKNYYDTIVNMQAENAVRVVSCGVLQ
           ** **:* .*: * : : * *****:*****:***** ** : : . :*****:
DVSSJ2      TPRFGRKSTFLFVPGTKVTYECIQEFVLVGDQRRECQADGTWNIPEYGYTYCLRQEEYSS
MESH        TPRFGRKLSFDFMPGAKVSFECNEGFILIGDQRRECLSNGLWNIPEYGYTECLREVYYTR
           ***** :* *:****:***:*** : *:*:***** ::* ***** ***** :*
DVSSJ2      RQAAITSGIILAIIPLVLLLGYVGYKIYERLTSNNQNYDYDTVQKTQN-LQQFSRTLSP
MESH        RVAFIAIGIIFLVICPLMLCIVCGVYRQRQQLKEDPQWQMPMLPRSRASSARNLRTLNY
           * * * : ***: :* **:* : * : : . : : : : : : : : : : : : : * ** .
DVSSJ2      YREEDEDE-----KYPQSDTDSLK-----RRSYDKSYRTHEPLPNRPN-----
MESH        DDDSDTDASTLKKTKKWDLDENEDVTSSEGEKPKQLGRRSLHSASGTELDQHSPVDGD
           :.* * . :.* * *.: *** ..: * . * .
DVSSJ2      -----EFEEKPLDP-----YDQTFEDD-----RVSRTPTGS-----PTSPTSSIQYT
MESH        HPDEDDDFDEADVHTGTTHPVGYHQPLSPEEADQLHRQYSPTFSGLDSRTSGASSINYT
           :*: * :.. *.*.: : * . :** * ** :***:**
DVSSJ2      TPYSRPDIIRGN---SSKNLNYN----DMYAEPK-----KPKERISASQSSIV
MESH        PQAATQNRFGGVPVLPSTQYYSRPPSSVNTVPLRTAPTPLTQDTGLPSPPLATSPTPSV
           . : : : * .*:. *. . : : * : : * . : : * : . *
DVSSJ2      TDV---
MESH        QKSTEV

```

The predicted transmembrane domains with hydrophobic residues are indicated by underline. DVSSJ2 (MTSDTAPPD**TDQ**RG 108-121 a.a.; bold) peptide was used for monoclonal antibody production. This alignment was derived using CLUSTAL W with default parameters<sup>51</sup>. \* (asterisk) represents identical amino acid residues shared between DVSSJ2 and MESH, : (colon) conservation between two amino acid residues of strongly similar properties and . (period) indicates conservation between two amino acid residues of weakly similar properties.

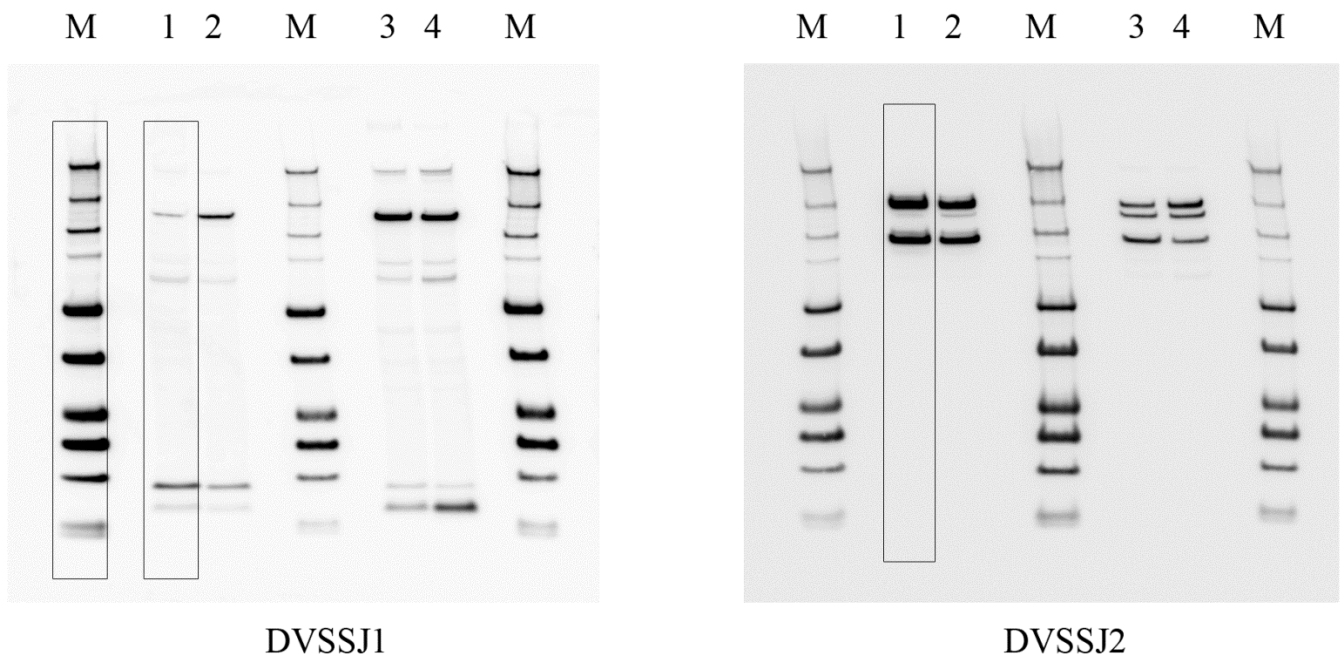

**Supplementary Figure 2.** Original pictures of western blots presented in results (boxes in Figure 3) to detect DVSSJ1 and DVSSJ2 from 3<sup>rd</sup> instar WCR dissected gut tissues.

Loaded protein samples represent the equivalent of one midgut (1) and 1/2 midgut (2). Protein samples (3 & 4) were extracted from midgut in 0.01 M phosphate buffered saline (NaCl 0.138 M; KCl - 0.0027 M); TWEEN<sup>®</sup> 20 - 0.05%, pH 7.4, at 25°C. The DVSSJ1 and DVSSJ2 detectable protein sizes are compared by Precision Plus Protein Western Standard (M) ranging from 10-250 kDa.

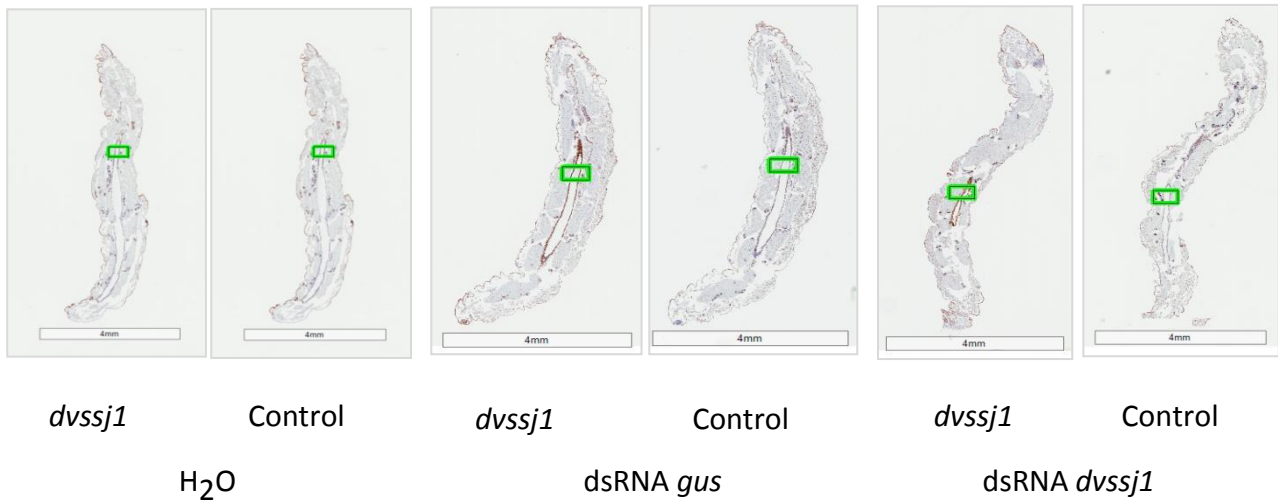

**Supplementary Figure 3.** Representative whole sections selected from ISH study.

WCR 3<sup>rd</sup> instar treated with H<sub>2</sub>O, dsRNA *gus* and *dvssj1* frag1 at 50 ng  $\mu\text{l}^{-1}$  for 48-hr. All treatments (two adjacent sessions) were hybridized with *dvssj1* probe and RNAscope® negative control probe (*Bacillus subtilis* dihydrodipicolinate reductase (*dapB*) gene). Only selected regions (box) were presented in results (Figure 4).

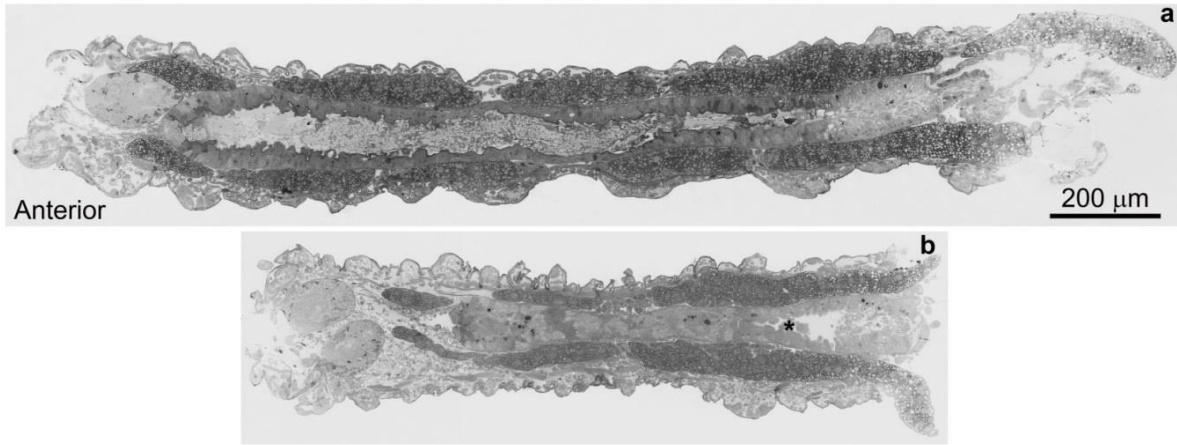

**Supplementary Figure 4.** Longitudinal cross sections of nearly entire neonates untreated (**a**) and treated (**b**) with *dvssj1* dsRNA, as seen in the scanning electron microscope via backscattered electron imaging at the same magnifications. Note the significantly reduced size and occlusion of the gut lumen of the treated individual (**b**) relative to that of the control. Evidence of highly active epithelial regeneration in the treated neonate is manifest as numerous enterocytes blebbing into the posterior midgut lumen (\*). Neonate anteriors are positioned to the left in both cases.

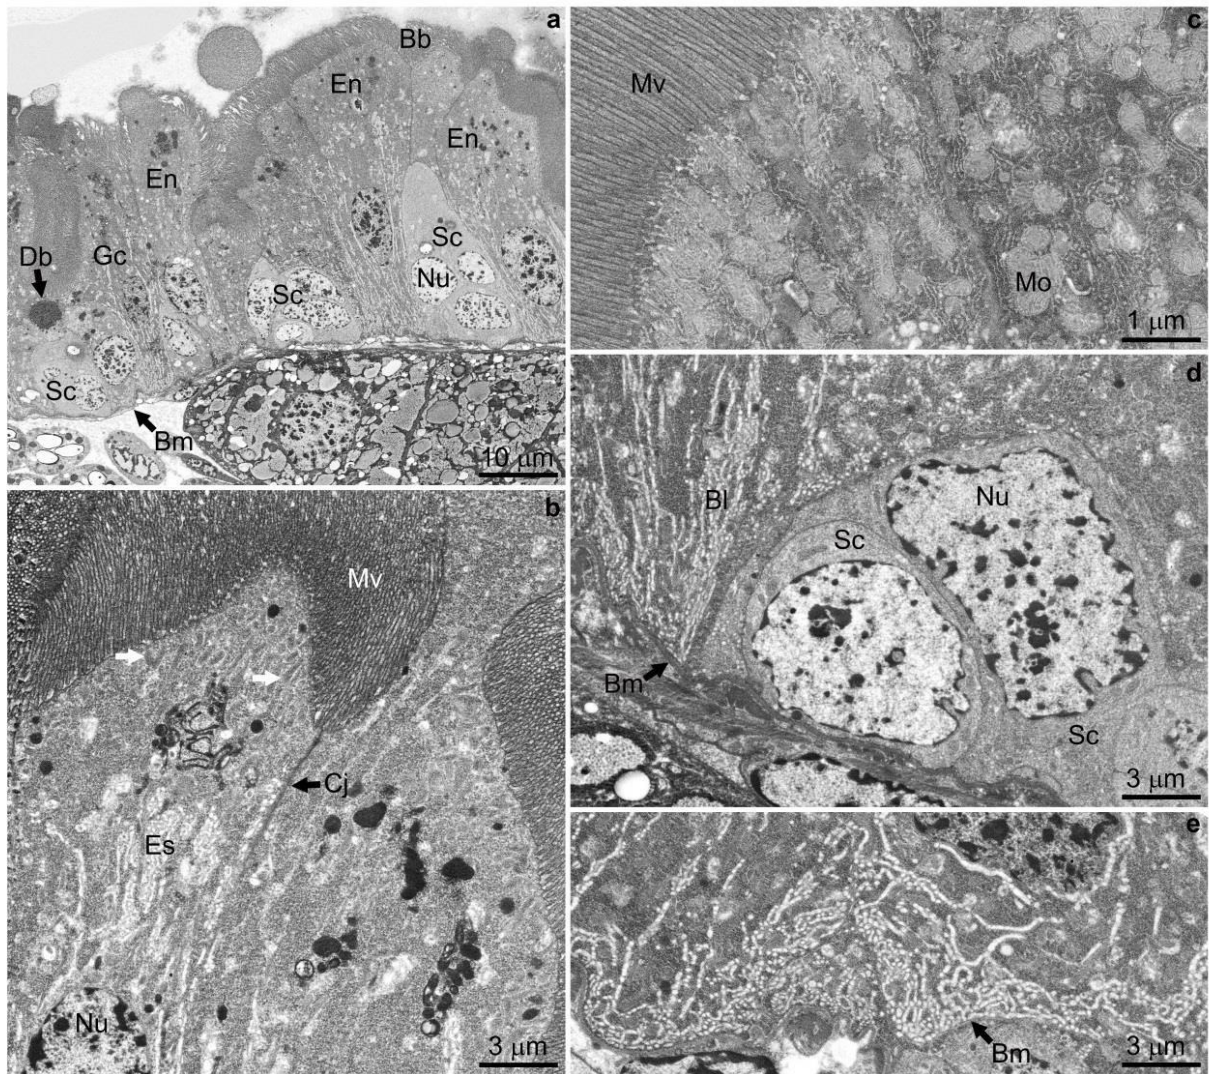

**Supplementary Figure 5.** Anterior midgut epithelium from untreated neonates.

(a) Region of midgut epithelium undergoing regeneration as evidenced by enlarged stem cells (Sc), the presence of a goblet cell (Gc) “dark body” (Db) apparently consisting of nascent microvilli, and blebbing of enterocytes into the gut lumen (top). Note the numerous electron dense cytoplasmic vesicles/tubules in the sub-brush border region of cells, and the prominent basal extracellular labyrinth that extends from the basal membrane of enterocytes upwards well beyond nuclei. Bb, brush border; Bm, basal membrane; En, enterocyte; Nu, nucleus. (b) Apical region of two epithelial cells. The sub-apical cytoplasm includes large numbers of mitochondria (white arrows), copious endoplasmic reticulum and free ribosomes, as well as electron dense vesicles/tubules and endosomal compartments (Es). Cj, cell junction; Mv, microvilli. (c) Cytoplasm adjacent to the apical membrane is densely populated with mitochondria (Mo) and endoplasmic reticulum (non-osmicated specimen). (d) Note prominent basal extracellular labyrinth (Bl) extending from the basal membrane (Bm), and the absence of any dark inclusion bodies from the cytoplasm of stem cells (Sc). (e) Typical basal region of enterocytes of untreated neonate anterior midgut exhibiting basal extracellular labyrinth, mitochondria and endoplasmic reticulum.

a.

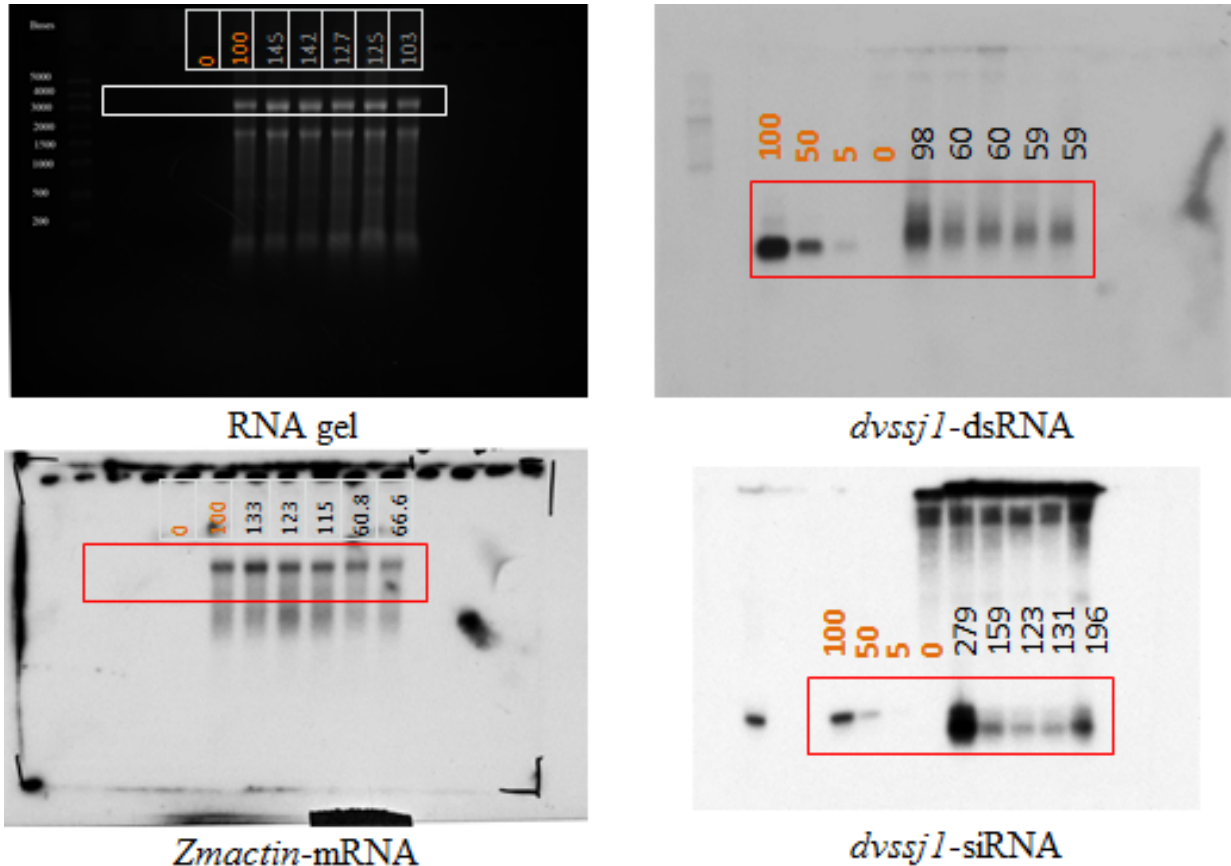

b.

gctaactaactagg ataataagttcgatTTTTTACGAAAATGACAAGTATCGAGACTGTGGGGACCAT  
TGTCCTGAAATTGCTGAAGTTGGTGATCAATTTGATATGTCTCATCTTGTACCGAACCGGATATCAAGG  
CTACTTCTTGGGAGTAGGAGGAACCTGGAACTAAACGAAGAAAAAATCCCGATGCAGAAATTGTGGC  
TTCCGGCGTATTCGTTAGG taattgagaattcgatatcaggtccgccttgTTTTCTCCTCTGTCTCTTGA  
tctgactaatcttggTTTATGATCTTGATGATTTAGCTTGACTATGCGATTGCTTTCCTGGACCCGTGC  
agctgcccatcgaccctcaatta cctacgaatacgcCGGAAGCCACAATTTCTGCATCGGGATTTTT  
TCTTCGTTTAGATTCCAGGTTCTCTACTCCAAGAAGTAGCCTTGATATCCGGTTCGGTACAAGATG  
AGACATATCAAATTGATCACAACCTCAGCAATTCAGGACAATGGTCCCCACAGTCTCGATACTTGTCT  
ATTTCTGTAATAAATCGAACTTATTAT cctagttagttagg

**Supplementary Figure 6.** Original northern blots of five *dvssj11* events and one transgenic negative isoline (red boxes in Figure 7).

(a) Double-strand *dvssj11* frag1 (210 bp, 100, 50 5 pg) RNA was loaded as positive control and *Zmactin* (Accession #: EU952376) was included as a reference gene for northern analysis to re-probe same blot; 29nt *dvssj11* oligo (100, 50 5 pg) was used as a positive control for the siRNA northern blot. Densitometry analyses of northern blots were carried out with Phoretix 1D software (Clever Scientific, UK) and relative amount (pg) of each lane was presented (Supplementary Table 3). (b) Sequences of *dvssj11* hairpin design. When single 5' and 3' untranslated region and loop region were removed, 210 bp of *dvssj11* frag1 (bold) was flanked with 14 bp and 8 bp to form 232 bp dsRNA transcripts (underline).



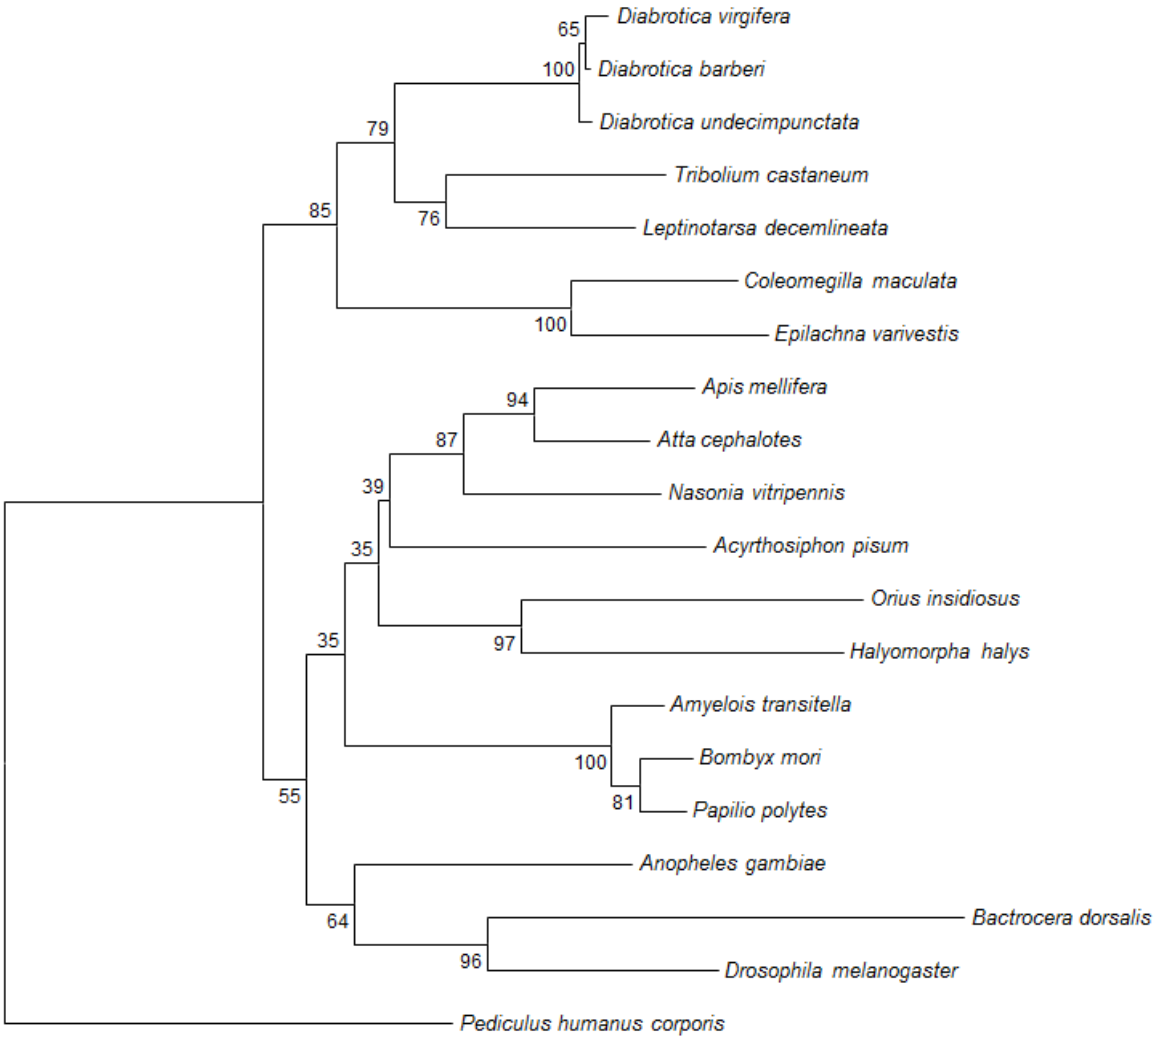

**Supplementary Fig 7.** Evolutionary relationships of selected orthologs of DVSSJ1 representing different insect orders.

The evolutionary history was inferred using the Neighbor-Joining method<sup>1</sup>. The optimal tree with the sum of branch length = 3.773 is shown. The percentage of replicate trees in which the associated taxa clustered together in the bootstrap test (1000 replicates) are shown next to the branches<sup>2</sup>. The tree is drawn to scale, with branch lengths in the same units as those of the evolutionary distances used to infer the phylogenetic tree. The evolutionary distances were computed using the Poisson correction method<sup>3</sup> and are in the units of the number of amino acid substitutions per site. The analysis involved 20 amino acid sequences. All ambiguous positions were removed for each sequence pair. There were a total of 177 positions in the final dataset. Evolutionary analyses were conducted in MEGA7<sup>4</sup>. SSJ proteins of following selected homologs of DVSSJ1 were analyzed this tree: *Diabrotica virgifera* (Seq.No. 693), *Diabrotica barberi* (Seq.No. 695), *Diabrotica undecimpunctata* (Seq.No.694), *Leptinotarsa decemlineata* (Seq.No. 697), *Epilachna varivestis* (Seq.No. 696), *Coleomegilla maculate* (Seq.No. 699), *Orius insidiosus* (Seq.No. 698), *Tribolium castaneum* (XP\_008197065.1), *Anopheles gambiae* (XP\_311473.3), *Bactrocera dorsalis* (XP\_011205009.1), *Drosophila melanogaster* (NP\_649184.1), *Acyrtosiphon pisum* (NP\_001156315.1), *Halyomorpha halys* (XP\_014277667.1), *Apis mellifera* (XP\_003249659.1), *Atta cephalotes* (XP\_012058457.1), *Nasonia vitripennis*, (XP\_003424573.1), *Amyelois transitella* (XP\_013199749.1), *Bombyx mori* (AK378208.1), *Papilio polytes* (XP\_013143312.1), and *Pediculus humanus corporis* (XP\_002427111.1). Seq. Nos were disclosed in US20140275208 A1.

**Supplementary Table 1a. Identification of dsRNA active targets against WCR**

| cDNA ID           | dsRNA size | primary Score | confirmation | Tc orthologs <sup>a</sup> | E-value   | % identity | Annotation <sup>d</sup>                                 | CG orthologs <sup>b</sup> | Seq ID <sup>c</sup> |
|-------------------|------------|---------------|--------------|---------------------------|-----------|------------|---------------------------------------------------------|---------------------------|---------------------|
| idv1c.pk037.j20.f | 593        | 3.0           | 3.0          | TC008407                  | 4.50E-68  | 61         | Protein mesh-like Protein; named <i>dvssj2</i>          | mesh/CG31004              | Seq No.001          |
| idv1c.pk034.k22.f | 445        | 2.6           | 2.0          | TC013063                  | 2.20E-60  | 98.0       | DNA directed RNA polymerase II 18kD subunit             | Rpl118/CG1163             | Seq No.009          |
| iw1c.pk019.o21    | 204        | 2.1           | 3.0          | TC009191                  | 8.20E-19  | 67.2       | Protein transport protein Sec23A-like Protein           | Sec23/CG1250              | Seq No.017          |
| iw1c.pk026.h16    | 635        | 1.8           | 2.4          | TC001073                  | 2.40E-109 | 86.4       | T-complex protein 1 subunit alpha-like Protein          | CG8258                    | Seq No.037          |
| iw1c.pk029.h21    | 670        | 2.4           | 2.3          | TC008784                  | 1.60E-22  | 84.4       | Elongation factor 2-like Protein                        | EF2/CG2238                | Seq No.045          |
| iwm2c.pk004.m2    | 528        | 2.6           | 2.6          | TC002574                  | 3.20E-23  | 82.9       | Signal recognition particle 54 kDa protein-like Protein | Srp54k/CG4659             | Seq No.049          |
| iwm2c.pk005.i7    | 583        | 2.3           | 1.8          | TC007744                  | 6.20E-112 | 91         | T-complex protein 1 subunit gamma-like Protein          | Cct5/CG8439               | Seq No.057          |
| iwm2c.pk008.e24   | 588        | 2.5           | 1.9          | TC012303                  | 3.40E-111 | 98.3       | Eukaryotic translation initiation factor 3 subunit A    | eIF3-S10/CG9805           | Seq No.061          |
| idv1c.pk015.b8.f  | 716        | 3.0           | 3.0          | TC011289                  | 2.70E-77  | 74.7       | GTP-binding protein SAR2                                | Sar1/CG7073               | Seq No.065          |
| idv1c.pk019.h19.f | 619        | 2.1           | 2.4          | TC013376                  | 1.60E-55  | 78.8       | Homocysteine S-methyltransferase 2-like Protein         | CG10623                   | Seq No.069          |
| idv1c.pk026.d10.f | 319        | 2.6           | 3.0          | TC002583                  | 3.30E-56  | 98.9       | Histone H2A                                             | His2A/CG31618             | Seq No.077          |
| idv1c.pk037.j14.f | 587        | 2.6           | 2.3          | TC009158                  | 6.30E-127 | 98.4       | Ras-like GTP-binding protein Rho1                       | Rho1/CG8416               | Seq No.085          |
| idv1c.pk038.d14.f | 614        | 2.6           | 2.9          | TC014413                  | 2.00E-91  | 93.9       | ATP-dependent RNA helicase WM6-like Protein             | Hel25E/CG7269             | Seq No.101          |
| idv1c.pk040.c10.f | 368        | 2.6           | 2.0          | TC002461                  | 1.70E-48  | 74.5       | Nuclear transport factor 2 (NTF2) domain protein        | Nxt1/CG12752              | Seq No.113          |
| idv1c.pk042.g10.f | 628        | 2.0           | 1.4          | TC002738                  | 6.30E-106 | 89.9       | Eukaryotic translation initiation factor 3 subunit E    | Int6/CG9677               | Seq No.125          |
| idv1c.pk042.i20.f | 619        | 2.1           | 2.1          | TC001437                  | 1.60E-113 | 96.0       | AP-1 complex subunit mu-1-like Protein                  | AP-1mu/CG9388             | Seq No.129          |
| idv1c.pk002.j17.f | 589        | 2.4           | 2.5          | TC008015                  | 2.10E-96  | 81.7       | Proteasome subunit alpha type                           | Prosalpha7/CG1519         | Seq No.137          |
| idv1c.pk003.d6.f  | 577        | 2.3           | 1.8          | TC000069                  | 2.50E-109 | 83.3       | Proteasome subunit beta type-1-like Protein             | Prosbeta6/CG4097          | Seq No.141          |
| idv1c.pk016.h19.f | 542        | 2.6           | 2.1          | TC008665                  | 1.10E-85  | 89.1       | Proteasome subunit beta type                            | Prosbeta1/CG8392          | Seq No.145          |
| idv1c.pk025.a4.f  | 559        | 2.6           | 2.6          | TC014286                  | 1.60E-116 | 94.6       | Proteasome non-ATPase regulatory subunit 3-like protein | Rpn3/CG42641              | Seq No.149          |
| idv1c.pk047.d23.f | 529        | 2.4           | 2.0          | TC000258                  | 8.20E-102 | 91.2       | Proteasome subunit alpha type                           | Prosalpha6/CG4904         | Seq No.165          |
| idv1c.pk045.e5.f  | 628        | 2.3           | 2.3          | TC003184                  | 2.60E-24  | 88.7       | Dosage compensation regulator-like Protein              | mle/CG11680               | Seq No.237          |
| idv1c.pk046.p17.f | 524        | 2.4           | 2.6          | TC014786                  | 4.10E-63  | 94.1       | small GTP binding protein RAB5                          | Rab5/CG3664               | Seq No.245          |
| idv1c.pk054.k12.f | 546        | 2.1           | 2.0          | TC007406                  | 2.60E-92  | 89.4       | 60S ribosomal protein L9-like Protein                   | RpL9/CG6141               | Seq No.301          |
| idv1c.pk057.h7.f  | 670        | 2.4           | 2.4          | TC009126                  | 3.80E-112 | 83.9       | Heat shock protein 68a                                  | Hsc70-4/CG4264            | Seq No.309          |
| idv1c.pk057.n10.f | 672        | 2.0           | 2.4          | TC012133                  | 7.70E-112 | 95.2       | V-type proton ATPase subunit B                          | Vha55/CG17369             | Seq No.313          |
| idv1c.pk058.b17.f | 500        | 2.3           | 2.1          | TC001251                  | 9.70E-78  | 100        | Calmodulin-like Protein                                 | CG17770                   | Seq No.317          |
| idv1c.pk055.m8.f  | 718        | 2.3           | 2.3          | TC009965                  | 1.10E-98  | 98.7       | Ras-related protein Rab-3-like Protein                  | Rab9Fb/CG32670            | Seq No.329          |
| idv3c.pk007.i8.f  | 440        | 2.3           | 2.1          | TC006296                  | 6.10E-81  | 98.4       | Actin-5C-like Protein                                   | Act5C/CG4027              | Seq No.353          |
| idv3c.pk008.h22.f | 600        | 2.1           | 1.9          | TC011025                  | 6.20E-66  | 98.5       | V-type proton ATPase proteolipid subunit                | Vha16-5/CG6737            | Seq No.357          |
| idv3c.pk012.e23.f | 551        | 2.0           | 1.8          | TC004721                  | 9.70E-59  | 88.8       | Twitchin-like Protein                                   | bt/CG32019                | Seq No.365          |
| idv3c.pk013.g12.f | 586        | 2.0           | 2.0          | TC001225                  | 2.80E-78  | 98.9       | Polyubiquitin                                           | Ubi-p63E/CG11624          | Seq No.369          |
| idv3c.pk016.a10.f | 611        | 2.1           | 2.0          | TC001574                  | 3.60E-65  | 73.7       | actin-depolymerizing factor 1 [ <i>Bombyx mori</i> ]    | CG6873                    | Seq No.373          |
| idv1c.pk035.i17.f | 1156       | 2.8           | n/a          | TC005653                  | 4.80E-59  | 82.1       | Putative uncharacterized protein; named <i>dvssj1</i>   | Ssk/CG6981                | Seq No.573 or 234*  |
| idv1c.pk001.e9.f  | 566        | 1.57          | 2            | TC007928                  | 8.60E-74  | 90.4       | 40S ribosomal protein S10b-like Protein                 | RpS10b/CG14206            | Seq No. 8*          |

<sup>a</sup>Top TC orthologs were identified through TBLASTX against *Tribolium castaneum* Tcas3 (Genomic sequence); <sup>b</sup>Top CG orthologs were identified through TBLASTX against *Drosophila melanogaster* BDGP6 (Genomic sequence); <sup>c</sup>Sequences of RNAi active WCR genes were disclosed in US20110054007A1\* and US 20140275208A1; <sup>d</sup>Annotation of top TC or CG hits was made via UniProtKB/Swiss-Prot

**Supplementary Table 1b.** PCR primers for clone-specific amplification of WCR cDNAs to produce dsRNA for diet-based RNAi primary and confirmation screening

| <b>cDNA ID</b>    | <b>dsRNA size</b> | <b>Seq ID<sup>c</sup></b> | <b>PCR forward primer</b> | <b>PCR reverse primer</b> |
|-------------------|-------------------|---------------------------|---------------------------|---------------------------|
| idv1c.pk037.j20.f | 593               | Seq No.001                | TGACTTCACACTTCCAGATGGT    | TCGTTGAGAGTATTCCTGCTGA    |
| idv1c.pk034.k22.f | 445               | Seq No.009                | GTTTCGTTTCATCATCATTT      | TCGTCTATTCCTCAATCTTCAT    |
| iwc1c.pk019.o21   | 204               | Seq No.017                | CCCAATGCCGAGATATATTG      | AGGTATTATGCTGTGGACGA      |
| iwc1c.pk026.h16   | 635               | Seq No.037                | AATGGCTTTACACGTCCCTAAA    | AACCAGACCCCAAACTTTACA     |
| iwc1c.pk029.h21   | 670               | Seq No.045                | TCGTAATTTTTGGTTGTGCTTG    | TCAACTCTGACTTCACCCATTG    |
| iwm2c.pk004.m2    | 528               | Seq No.049                | CGTCAAAAGTATTTGTCGCATC    | TTTTACCTGATCATAGGCACCA    |
| iwm2c.pk005.l7    | 583               | Seq No.057                | GCACGAGGCTTTATTAGACAGAG   | TAAGTGATTGGCTTCATCATCG    |
| iwm2c.pk008.e24   | 588               | Seq No.061                | AGAGAACAGTCAGCACAAAGCAG   | GAAGAACTTGAACAAAGCAGCA    |
| idv1c.pk015.b8.f  | 716               | Seq No.065                | TTGAAAAAGATAGGGCTCCAAA    | CAATGACAGAACGAAATGGAAA    |
| idv1c.pk019.h19.f | 619               | Seq No.069                | TCGGTTCGATTTAGGTAGTAGGTG  | GTAGTTTTTCGCATAGGCTCCTG   |
| idv1c.pk026.d10.f | 319               | Seq No.077                | TGGTAAGGGAGGCAAAGTTAAG    | ATTAGGCAATACTCCACCTTGG    |
| idv1c.pk037.j14.f | 587               | Seq No.085                | AAC TTTGTGTGTTTTGGCAGGT   | GGGGCTTCTTCTTTTTTG        |
| idv1c.pk038.d14.f | 614               | Seq No.101                | CAACAATTTTCGCATCTTTCTG    | TTTTTCGATCTGACCAATGCTA    |
| idv1c.pk040.c10.f | 368               | Seq No.113                | GTTGCAGAAGATTTACAAAA      | TAGCGTTTAATGGTTCTTGCA     |
| idv1c.pk042.g10.f | 628               | Seq No.125                | CCAGTATTTAGACCGGCATCTC    | ATGGATCAACCAAGTCTCTGT     |
| idv1c.pk042.i20.f | 619               | Seq No.129                | TCACATTCAGTTGTTTAGA       | TCTTAGTACATTGCCATTTG      |
| idv1c.pk002.j17.f | 589               | Seq No.137                | CGATTTATCAGCTTCCCAATTC    | CAGCTCATCATGGACCAATAA     |
| idv1c.pk003.d6.f  | 577               | Seq No.141                | AATTGGTGCAGATACAGTTTTG    | CTAATCCCGTCTCAACTGGAAG    |
| idv1c.pk016.h19.f | 542               | Seq No.145                | TCTTCGTTCAATACCAGCTTCA    | AGTTTGATGGAGGCGTTGTAT     |
| idv1c.pk025.a4.f  | 559               | Seq No.149                | CTGAATTGACCAACAAATTGGA    | TTAATAACATTGTGGCGCAGTC    |
| idv1c.pk047.d23.f | 529               | Seq No.165                | ATTTTTGAGGTTGTGGCTAGA     | AGAAGGGCACGTTTGGTAGATA    |
| idv1c.pk045.e5.f  | 628               | Seq No.237                | TCATTGTGTCTAAAGGCATGA     | AAAATCACCGACTACGTCATCA    |
| idv1c.pk046.p17.f | 524               | Seq No.245                | GGTTGCCGTCGTTTAGTAGAAG    | CCGAATGTGTCTTGATTGGTTA    |
| idv1c.pk054.k12.f | 546               | Seq No.301                | CAAGTAGGGCTAAAATGAAGCAA   | AAAGCCCATCTAAGAATTTACGG   |
| idv1c.pk057.h7.f  | 670               | Seq No.309                | ATTGCAGTCATTGCTGTAGTGC    | CGAAAATGAGGACGTTTCTTTC    |
| idv1c.pk057.n10.f | 672               | Seq No.313                | TACACGTAAAAATGGCTTCGAC    | TTAACCCCATAGCAGCGAAC      |
| idv1c.pk058.b17.f | 500               | Seq No.317                | ACTTTGACGAGAGGCGTTGT      | CGTAATTGACTTGACCATCACC    |
| idv1c.pk055.m8.f  | 718               | Seq No.329                | GTTGGGATTGGGATTTAACAAA    | TTGATCGAACCTAACCTTATTTCC  |
| idv3c.pk007.i8.f  | 440               | Seq No.353                | GTAATGAAAGATTCGGTTGT      | CCCAAGATGGGGGATATAAAA     |
| idv3c.pk008.h22.f | 600               | Seq No.357                | GTTTCGCTAGTTCGTTAGTGTGTT  | CAACTTTTTGGTACGCTGTGTTT   |
| idv3c.pk012.e23.f | 551               | Seq No.365                | GATCTTTAGTCAGTGCTTT       | TGGGGCTGTAGTTGAGATTGA     |
| idv3c.pk013.g12.f | 586               | Seq No.369                | GAGTAGTCGGTATGTATTT       | ATTTCTCATCTCCTGGTTTGA     |
| idv3c.pk016.a10.f | 611               | Seq No.373                | CTCCGAAGACAGACAGTCGAT     | AAATAATACACCTCGGCAGGTC    |
| idv1c.pk035.i17.f | 1156              | Seq No.573                | ATAATAAGTTTCGATTTTTTACG   | GCAGACAAAACCCATCAAGCATG   |
| idv1c.pk001.e9.f  | 566               | Seq No. 8*                | CTTTCTGATTTTTGACAG        | AACCAAACTTTTTATTGGCTGATC  |

**Supplementary Table 2.** WCR feeding results of additional active targets and fragments

| dsRNA Name                  | base pair | primary score | LC50 ng $\mu$ l <sup>-1</sup> | IC50 ng $\mu$ l <sup>-1</sup> | Forward primer                | Reverse primer                    |
|-----------------------------|-----------|---------------|-------------------------------|-------------------------------|-------------------------------|-----------------------------------|
| <i>dvssj1</i> FIS           | 1156      | 2.8           | n/a                           | n/a                           | GGAGATCACAAAACGACATTCA        | TATGAAGAGAACGGGAGGAAAA            |
| <b><i>dvssj1</i> frag1</b>  | 210       | 2.9           | 0.045                         | 0.014                         | ATAATAAGTTCGATTTTTACGAAAATG   | TACGAATACGCCGGAAGC                |
| <i>dvssj1</i> frag2         | 145       | 3             | 0.098                         | 0.014                         | ACGAAAATGACAAGTATCGAGA        | CTTCGTTTAGATTCCAGGTTTC            |
| <i>dvssj1</i> frag5         | 502       | 2             | 0.163                         | 0.3                           | ATAATAAGTTCGATTTTTACGAAAATG   | TTGCATTTTGGCTTTGAGGATAAAG         |
| <i>dvssj2</i> FIS           | 573       | 3             | 1.738                         | 0.366                         | TGACTTCACACTCCAGATGGT         | TCGTTGAGAGTATTCCTGCTGA            |
| <i>dvssj2</i> frag1         | 225       | 2.6           | 0.447                         | 0.149                         | CGACAAGGAGGAAAGTTGTG          | TCGTTGAGAGTATTCCTGCTG             |
| <b><i>dvssj2</i> frag7</b>  | 162       | 2.4           | 0.121                         | 0.054                         | TTTTGTTTTGTTTAGTGTAGCGTTAAAGG | TGGAGGGACTCCATTAGGCGTAT           |
| <i>dvrps10</i> FIS          | 600       | 1.57          | n/a                           | n/a                           | GGGGCTTCTGATTTTTGACAG         | AACCAAACTTTTATTGGCTGATC           |
| <i>dvrps10</i> frag1        | 263       | 1.75          | 200                           | 2.81                          | GACTAACTCTGGCATCGAATACCTC     | GTGGTGCCCGTCCACGTC                |
| <i>dvrps10</i> frag2        | 208       | 1.88          | 131                           | 3.4                           | GTCCCATCTACCTTGAACGC          | GTGGTGCCCGTCCACGTC                |
| <b><i>dvrps10</i> frag4</b> | 557       | 2.88          | 0.146                         | 0.03                          | AAGGTTACGTAAAGGAACAA          | GAGTCCTTCTGTATCCTGCA              |
| <i>dvpat3</i> FIS           | 1043      | 1.13          | n/a                           | n/a                           | GGGGAGTCGTCAACATCAATTTTC      | GACATAAAGTTATGTATTTATTAGAAAAAAG   |
| <i>dvpat3</i> frag5         | 322       | 2.5           | 27.98                         | 0.992                         | GGAGTCGTCAACATCAATTTCA        | GCCTATTACGGTGCCACTATT             |
| <i>dvpat3</i> frag8         | 161       | 2.5           | 1.995                         | 0.223                         | CAAGTTGAATATGCAATGAAAGCAG     | CCTATGTGTTTATCAATGTTGAAAATTCG     |
| <i>dvpat3</i> frag10        | 161       | 2.5           | 88.86                         | 0.38                          | GACCATTGTTGTCAGTGCATCTTG      | CCCCATCTTCAATTTTCTATTTTCAG        |
| <b><i>dvpat3</i> frag13</b> | 161       | 2             | 0.54                          | 0.023                         | AATATGGTTCAAATATTCCTCTTAAATAC | TCCAGATGGATCAATCAGATACATAG        |
| <i>dvprtb</i> FIS           | 913       | 2.5           | 4.105                         | 0.186                         | GGGGGCAGTTATTTGACTTTTC        | GTTTATTTAGAAAGTATTTGAATTACACATAAG |
| <b><i>dvprotb</i> frag1</b> | 203       | 2.13          | 4.558                         | 0.047                         | TACCAGAGAACAAAACAACTTTTCC     | AAGGAAAGAATCTCTGTAGTAGAGC         |

The most active fragments of five RNAi active targets were selected (bold) for LT<sub>50</sub> comparison (Table 2). *Dvpat3* frag13 is a 161 bp sequence from Proteosome alpha 3 type subunit (*pat3*); *dvprotb* frag1 is a 203 bp sequence from Proteosome subunit beta type 1 (*protb*), and *dvrps10* frag4 is a 557 bp sequence from the ribosomal protein s10e gene.

**Supplementary Table 3.** Primer and probe designs for qRT-PCR, qPCR, in situ hybridization (ISH) and northern analyses

| Designation <sup>a</sup>                                                          | C° | Sequence or source                                                                                                                                                                                                                                                                                                                                                        |
|-----------------------------------------------------------------------------------|----|---------------------------------------------------------------------------------------------------------------------------------------------------------------------------------------------------------------------------------------------------------------------------------------------------------------------------------------------------------------------------|
| <b>qRT-PCR<sup>b</sup></b>                                                        |    | <b>primer designs for WCR expression study</b>                                                                                                                                                                                                                                                                                                                            |
| WCR <i>dvssj1</i> F                                                               | 60 | CGTGAAGCCCAGTAAATACCT                                                                                                                                                                                                                                                                                                                                                     |
| WCR <i>dvssj1</i> R                                                               |    | GTTTTGTTTTATTTAATTGCAGACAA                                                                                                                                                                                                                                                                                                                                                |
| WCR <i>dvssj1</i> P (FAM)                                                         |    | AAACCCATCAAGCATGGCAGTTCC                                                                                                                                                                                                                                                                                                                                                  |
| WCR <i>dvrps10</i> F                                                              | 60 | GATGTTGAGTTCAGGCAAGGATT                                                                                                                                                                                                                                                                                                                                                   |
| WCR <i>dvrps10</i> R                                                              |    | CCAAACTTTTTATTGGCTGATCAAT                                                                                                                                                                                                                                                                                                                                                 |
| WCR <i>dvrps10</i> (VIC)                                                          |    | ACGTGGACGGGCAC                                                                                                                                                                                                                                                                                                                                                            |
| <b>qPCR</b>                                                                       |    | <b>primer designs for transgenic copy number<sup>c</sup></b>                                                                                                                                                                                                                                                                                                              |
| <i>dvssj1</i> -frag1 F                                                            | 60 | CTTGACTATGCGATTGCTTTCT                                                                                                                                                                                                                                                                                                                                                    |
| <i>dvssj1</i> -frag1 R                                                            |    | TCCGGCGTATTCGTAGGTAATT                                                                                                                                                                                                                                                                                                                                                    |
| <i>dvssj1</i> -frag1 P                                                            |    | CTGCCCATCGACCCT                                                                                                                                                                                                                                                                                                                                                           |
| NLB F                                                                             | 60 | TGATTCCGATGACTTCGTAGGTT                                                                                                                                                                                                                                                                                                                                                   |
| NLB R                                                                             |    | GCTAATCGTAAGTGACGCTTGGA                                                                                                                                                                                                                                                                                                                                                   |
| NLB P                                                                             |    | TAGCTCAAGCCGCTCG                                                                                                                                                                                                                                                                                                                                                          |
| NRB F                                                                             | 60 | CATGAAGCGCTCACGGTACTAT                                                                                                                                                                                                                                                                                                                                                    |
| NRB R                                                                             |    | TCGTACGCTACTGCCACCAA                                                                                                                                                                                                                                                                                                                                                      |
| NRB P                                                                             |    | ACGGTTAGCTTCACGACT                                                                                                                                                                                                                                                                                                                                                        |
| <b>In situ hybridization</b>                                                      |    | <b>RNA probes<sup>d</sup></b>                                                                                                                                                                                                                                                                                                                                             |
| <i>dapB</i> probe                                                                 |    | SKU: 310043; RNAscope <sup>®</sup> Probe as negative control probe                                                                                                                                                                                                                                                                                                        |
| <i>dvssj1</i> RNA probe (357 nt); <i>dvssj1</i> (KU562965) from 105 to 461 of orf |    | CUUGGGAGUAGGAGGAACCUUGAAUCUAAACGAAGAAAAAAUCCCGAUGCAGAAUUGUG<br>GCUUCCGGCGUUAUUCGUAGGAUUUAUGAUUUACACAUUCGUCUCGUGAUCAGCCUUUGCU<br>UCGCUAGUGGAGAUCAAAAACGACAUUCACUGAUUUUCUGAUGAAUUAUGUAGGGAUUUU<br>UAUGUGGAUAGCUGUUGGAGCUACAGCUCUUCAUUUAUUGGCUUUGGGUACUUGUCCGAAUA<br>CAAAUACACGACAAUAGAUUCUGAACGACAAGUUGGUUUGGCGUAGGAGCGAUGUGUAUA<br>AUAAAUGGAGCGGUCUAUCUUGUAGACGGAGUACUUUCC |
| <b>Northern analysis</b>                                                          |    | <b>probe sequences or source</b>                                                                                                                                                                                                                                                                                                                                          |
| <i>dvssj1</i> -frag1                                                              | 65 | ATAATAAGTTCGATTTTTTACGAAAATGACAAGTATCGAGACTGTGGGGACCATTGTCTCTG<br>AAATTGCTGAAGTTGGTGATCAATTTGATATGTCTCATCTTGTACCGAACCGGATATCAAG<br>GCTACTTCTTGGGAGTAGGAGGAACCTGGAATCTAAACGAAGAAAAAATCCCGATGCAGA<br>AATTGTGGCTTCCGGCGTATTCGTAGG                                                                                                                                            |
| <i>zmactin</i>                                                                    | 65 | Accession #: EU952376                                                                                                                                                                                                                                                                                                                                                     |
| <i>dvssj1</i> 29 nt oligo control                                                 | 37 | GATAATAAGTTCGATTTTTTACGAAAATG                                                                                                                                                                                                                                                                                                                                             |

<sup>a</sup>Sequences of PCR primers (F=forward; R=reverse) and probes (P) were listed; <sup>b</sup>qRT-PCR was conducted on Quant Studio 7Flex for 35 cycles; <sup>c</sup>qPCR was performed on Roche LightCycler<sup>®</sup> 480 for 40 cycles;

<sup>d</sup>Sequences of target probes, preamplifier, amplifier, and label probe are designed by Advanced Cell

Diagnostics (Hayward, CA); <sup>e</sup>Temperatures of PCR annealing or hybridizations; NRB: A synthetic sequence designed to facilitate PCR analysis of transgene insert near right border (RB) of T-DNA; NLB: A synthetic sequence designed to facilitate PCR analysis of transgene insert near left border (LB) of T-DNA.

**Supplementary Table 4.** Characterization of T1 transgenic *dvssj1* plants

| Event  | NRB copy # | <i>dvssj1</i> copy # | NLB copy # | Number of plants | Mean Score | Difference | Std Err Diff | p-Value | dsRNA band (pg) | siRNA band (pg) |
|--------|------------|----------------------|------------|------------------|------------|------------|--------------|---------|-----------------|-----------------|
| 6.1.25 | 3          | 4                    | 3          | 14               | 0.1179     | 1.3655     | 0.1307       | <.0001* | 98              | 279             |
| 6.4.2  | 0          | 1                    | 2          | 14               | 0.1214     | 1.3987     | 0.1333       | <.0001* | 60              | 159             |
| 6.4.18 | 1          | 1                    | 1          | 15               | 0.1667     | 1.3167     | 0.1284       | <.0001* | 60              | 123             |
| 6.2.7  | 1          | 1                    | 1          | 15               | 0.4000     | 1.0833     | 0.1284       | <.0001* | 59              | 131             |
| 6.2.3  | 0          | 1                    | 1          | 15               | 0.6100     | 0.8733     | 0.1284       | <.0001* | 59              | 196             |
| NULL   | 0          | 0                    | 0          | 15               | 1.4833     | -          | -            | -       | 0               | 0               |

T1 transgenic seeds were planted and leaf samples were used for qPCR analysis<sup>5</sup> of copy number of transgene, which detected *dvssj1* hairpin region and sequences near LB (NLB) or RB (NRB) of T-DNA (Supplementary Table 3). Only PCR positive plants were selected for WCR bioassay and northern blot analyses. Statistical calculations were performed using JMP 12.0.1 statistical software. Data were checked for normal distribution by Shapiro-Wilk W Test ( $p < 0.0001$ ) indicating that the data does not follow a normal distribution. Extreme outliers were identified and excluded using Grubb's Outlier Test. To assess the root protection from corn rootworm feeding conveyed by *dvssj1* in transgenic plants the data were analyzed by non-parametric one-way ANOVA (Kruskal-Wallis) showing there was a difference detected among events ( $p < 0.0001$ ). Dunnett's *post hoc* test was used to compare all treatments against the control treatment, NULL. There is significant evidence identifying a difference in nodal injury score between the NULL and all other events, each with a p-value  $< 0.0001$ . Densitometry analyses of northern blots were carried out with Phoretix 1D software and relative amount (pg) of each event based on positive control (100 pg) in Supplementary Fig 7.

**Supplementary Table 5.** List of DVSSJ1 orthologs.

| Scientific name                   | Common name                | Order        | Seq No./Accession # |
|-----------------------------------|----------------------------|--------------|---------------------|
| <i>Diabrotica virgifera</i>       | western corn rootworm      | Coleoptera   | Seq. No.693         |
| <i>Diabrotica barberi</i>         | northern corn rootworm     | Coleoptera   | Seq. No.695         |
| <i>Diabrotica undecimpunctata</i> | southern corn rootworm     | Coleoptera   | Seq. No.694         |
| <i>Leptinotarsa decemlineata</i>  | Colorado potato beetle     | Coleoptera   | Seq. No.697         |
| <i>Epilachna varivestis</i>       | Mexican bean beetle        | Coleoptera   | Seq. No.696         |
| <i>Coleomegilla maculata</i>      | spotted lady beetle        | Coleoptera   | Seq. No.699         |
| <i>Tribolium castaneum</i>        | red flour beetle           | Coleoptera   | XP_008197065.1      |
| <i>Anopheles gambiae</i>          | mosquitoes                 | Diptera      | XP_311473.3         |
| <i>Bactrocera dorsalis</i>        | oriental fruit fly         | Diptera      | XP_011205009.1      |
| <i>Drosophila melanogaster</i>    | fruit fly                  | Diptera      | NP_649184.1         |
| <i>Acyrtosiphon pisum</i>         | pea aphid                  | Hemiptera    | NP_001156315.1      |
| <i>Halyomorpha halys</i>          | brown marmorated stink bug | Hemiptera    | XP_014277667.1      |
| <i>Orius insidiosus</i>           | insidious flower bug       | Hemiptera    | Seq. No.698         |
| <i>Apis mellifera</i>             | honey bee                  | Hymenoptera  | XP_003249659.1      |
| <i>Atta cephalotes</i>            | leafcutter ant             | Hymenoptera  | XP_012058457.1      |
| <i>Nasonia vitripennis</i>        | jewel wasp                 | Hymenoptera  | XP_003424573.1      |
| <i>Amyelois transitella</i>       | navel orangeworm           | Lepidoptera  | XP_013199749.1      |
| <i>Bombyx mori</i>                | silkworm                   | Lepidoptera  | AK378208.1          |
| <i>Papilio polytes</i>            | common Mormon              | Lepidoptera  | XP_013143312.1      |
| <i>Pediculus humanus corporis</i> | human body louse           | Phthiraptera | XP_002427111.1      |

*Dvssj1orf* was used to search Ensembl genomes and NCBI database (tBlastx; E-value threshold=1e-1; BLOSUM 62 or BOLSUM 45) and no hits was found from human, mouse, maize, *C. elegans* or other organisms outside of arthropod. Only selected sequences representing different groups of insects were listed in this table and built for consensus tree (Supplementary Fig. 6). Seq. Nos were insect transcripts disclosed in US20140275208 A1.



## Supplementary Method

### Microscopy

Neonates were collected after 72 h incubation with dsRNA ( $100 \text{ ng } \mu\text{l}^{-1}$ ) and prepared for electron microscopy as follows. An anesthesia chamber was prepared by placing an aluminum pan filled with  $\text{CO}_2$  pellets in the bottom half of a vacuum desiccator (Bel-Art, Wayne, NJ), and covered with the desiccator's lid with the air valve open. Only neonates having consumed the amended diet as determined by direct observation of Cy3 fluorescence signal in the digestive tract were selected; non-feeders were discarded. Petri plates with selected neonates were moved to an anesthesia chamber and placed on a Styrofoam block on a shelf above  $\text{CO}_2$  pellets for 20 minutes. Neonates were fixed in a solution of 5% acrolein (Sigma, St. Louis, MO) and 0.25% glutaraldehyde (Electron Microscopy Sciences, EMS, Hatfield, PA) in 100 mM cacodylate buffer pH 7.2, with 1 mM  $\text{CaCl}_2$  and 100 mM sucrose. Anesthetized neonates were rapidly transferred to the filter paper saturated with fixation solution and additional fixation solution added until they were nearly submerged for an initial fixation of 30 minutes. With the aid of a dissecting microscope, an ophthalmic scalpel (EMS, Hatfield, PA) was used to remove the proximal and distal ends of each neonate to allow further penetration of the fixative and embedding resin, but without cutting through the digestive tract. Neonates were transferred to a 20 ml glass scintillation vial containing 10 ml of fresh fixation solution on a rotisserie at room temperature for 4 h, and then to a rotisserie at  $4^\circ\text{C}$  overnight. Neonates were rinsed 3 x 30 minutes in cacodylate buffer (minus the sucrose) on a rotisserie at room temperature. Some neonates were then post-fixed in 1%  $\text{OsO}_4$  in cacodylate buffer for 3 h at room temperature, then at  $4^\circ\text{C}$  overnight. All micrographs depict osmicated specimens unless noted otherwise. Samples were rinsed on a rotisserie at room temperature 3 x 30 minutes in cacodylate buffer, then in  $\text{ddH}_2\text{O}$ , and transferred

to 5% ethanol in ddH<sub>2</sub>O overnight. Dehydration continued using 20%, 50%, 80% ethanol, and three rinses in 100% ethanol, one hour on a rotisserie at room temperature for each change. Resin embedding was achieved by infiltration with LR White (Sigma, St. Louis, MO) in ethanol at 5%, 20%, 50%, 80%, and three changes at 100%, 24 h between changes, on a rotisserie at room temperature. Infiltrated neonates were placed into gelatin capsules (Ted Pella, Redding, CA) which were then filled with fresh LR White, capped, and polymerized at 60°C for 72 h. We adapted the methods described elsewhere for subsequent preparation and examination of ultrastructure via backscattered electron imaging in a scanning electron microscope

### **Supplementary References:**

- 1 Saitou, N. & Nei, M. The neighbor-joining method: a new method for reconstructing phylogenetic trees. *Mol. Biol. Evol.* **4**, 406-425 (1987).
- 2 Felsenstein, J. Confidence Limits on Phylogenies: An Approach Using the Bootstrap. *Evolution* **39**, 783-791, doi:10.2307/2408678 (1985).
- 3 Zuckerkandl, E. & Pauling, L. in *Evolving Genes and Proteins*. pp.97-166 (Academic Press, 1965).
- 4 Kumar, S., Stecher, G. & Tamura, K. MEGA7: Molecular Evolutionary Genetics Analysis version 7.0 for bigger datasets. *Molecular Biology and Evolution*, doi:10.1093/molbev/msw054 (2016).
- 5 Zhi, L. *et al.* Effect of Agrobacterium strain and plasmid copy number on transformation frequency, event quality and usable event quality in an elite maize cultivar. *Plant Cell Rep.* **34**, 745-754, doi:10.1007/s00299-014-1734-0 (2015).
